# Supplementary material for: Novel High Content Screen Detects Compounds That Promote Neurite Regeneration from Cochlear Spiral Ganglion Neurons
Source: PubMed Central journal article supplement (PMC4629150; doi:10.1038/srep15960), 2015-11-02
Supplement: srep15960-s1.pdf [file srep15960-s1.pdf]

# Supplemental Information Table 1

## **Novel High Content Screen Detects Compounds That Promote Neurite Regeneration from Cochlear Spiral Ganglion Neurons**

Donna S. Whitlon<sup>1,2,3\*</sup>, Mary Grover<sup>1</sup>, Sara F. Dunne<sup>4</sup>, Sonja Richter<sup>1</sup>, Chi-Hao Luan<sup>4</sup>  
and Claus-Peter Richter<sup>1,2,5</sup>

All compounds assayed at 8.3µM  
Compounds in italics were also assayed in BMP4 medium

Nalbuphine  
Raclopride  
Zacopride  
SKF 83566  
3'-deoxydenosine  
AM 404  
PILOCARPINE HYDROCHLORIDE  
NIFEDIPINE  
Flurbiprofen  
3-HYDROXY-1,2-DIMETHYL-4(1H)-PYRIDONE  
LOXAPINE SUCCINATE  
d-3-Methoxy-N-methylmorphinan hydrobromide  
Duloxetine  
Glycine, N-[2-[(acetylthio)methyl]-1-oxo-3-phenylpropyl]-,phenylmethyl ester [CAS]  
Benzeneacetic acid, 2-[(2,6-dichlorophenyl)amino]-, monosodium salt [CAS]  
PROGESTERONE  
FAMOTIDINE  
SR 57,227A  
Pancuronium  
METRONIDAZOLE  
Benzeneacetic acid, Alpha-(hydroxymethyl)-, 9-methyl-3-oxa-9-azatricyclo[3.3.1.0<sup>2,4</sup>]non-7-yl ester, [7(S)-(1Alpha,2AfAc,4AfAc,5Alpha,7AfAc)]- [CAS]  
Benzeneacetonitrile, Alpha-[3-[[2-(3,4-dimethoxyphenyl)ethyl]methylamino]propyl]-3,4-dimethoxy-Alpha-(1-methylethyl)-, (R)- [CAS]  
Benzeneethanamine, N,Alpha-dimethyl-N-2-propynyl-(R)- [CAS]  
Capsaicin  
SALBUTAMOL SULFATE  
(±)-Vesamicol hydrochloride  
Picrotin - Picrotoxinin  
Terazosin  
diphenylcyclopropanone  
4-Thiazolidinecarboxylic acid, 2-oxo-, (R)- [CAS]  
Mesoridazine  
3(2H)-Pyridazinone, 6-[4-(difluoromethoxy)-3-methoxyphenyl]- [CAS]  
10H-Phenothiazine, 2-chloro-10-[3-(4-methyl-1-piperazinyl)propyl]- [CAS]  
1H-Cyclopenta[b]quinolin-9-amine, 2,3,5,6,7,8-hexahydro-, monohydrochloride- [CAS]  
CLOTRIMAZOLE  
LORATADINE  
PHENELZINE SULFATE SALT  
Riluzole  
Naltrindole  
Nicotine  
Bifemelane  
CGS 15943  
Cinanserin  
Cisapride  
Indatraline  
TRAZODONE HYDROCHLORIDE  
Prazosin  
URAPIDIL HYDROCHLORIDE  
(-)-Cotinine  
D-CYCLOSERINE  
Fluvoxamine  
Doxepin  
TRIFLUOPERAZINE DIHYDROCHLORIDE  
(+)-3-HYDROXY-N-METHYLMORPHINAN D-TARTRATE  
L-Ornithine, N5-[imino(methylamino)methyl]-[CAS]  
Maprotiline HCl  
Pizotyline  
BETA-ESTRADIOL  
N,N'-DIACETYL-1,6-DIAMINOHEXANE  
DIPHENHYDRAMINE HYDROCHLORIDE  
Galanthamine  
Ifenprodil  
TETRAETHYLTHIURAM DISULFIDE  
Piribedil  
KETOCONAZOLE  
TRIPLENNAMINE HYDROCHLORIDE  
Pyrazinecarboxamide, 3,5-diamino-N-(aminoiminomethyl)-6-chloro- [CAS]  
9-AMINO-1,2,3,4-TETRAHYDROACRIDINE HYDROCHLORIDE  
ETHYNYLESTRADIOL  
2(1H)-Pyrimidinone, 4-amino-1-ÅfÅç-D-arabinofuranosyl- [CAS]  
L-Glutamic acid, N-[4-[[[(2,4-diamino-6-pteridinyl)methyl]methylamino]benzoyl]- [CAS]  
TFMPP  
Pramipexole  
LIDOCAINE  
Indomethacin  
LY 171883  
Paroxetine

|                                                                                  |
|----------------------------------------------------------------------------------|
| <i>Epigallocatechin gallate</i>                                                  |
| 5-Amino-2-hydroxy-benzoic acid                                                   |
| <i>Oxiranecarboxylic acid, 2-[6-(4-chlorophenoxy)hexyl]-, ethyl ester- [CAS]</i> |
| Cephalexin monohydrate                                                           |
| PIDOTIMOD                                                                        |
| RAMIPRIL                                                                         |
| LEVOFLOXACIN                                                                     |
| 19-Nortestosterone                                                               |
| NIZATIDINE                                                                       |
| 5-FLUOROCYTOSINE                                                                 |
| Trileptal                                                                        |
| TROXIPIDE                                                                        |
| ACTARIT                                                                          |
| AZELASTINE HCl                                                                   |
| TOCAINIDE                                                                        |
| TAXIFOLIN-(+/-)                                                                  |
| FENPIVERINIUM BROMIDE                                                            |
| CEFATRIZINE PROPYLENE GLYCOL                                                     |
| IDEBENONE                                                                        |
| LEVOSULPIRIDE                                                                    |
| Pemoline                                                                         |
| LETROZOLE                                                                        |
| MEROPENEM                                                                        |
| ORLISTAT                                                                         |
| ONDANSETRON HCl                                                                  |
| LEVONORGESTREL                                                                   |
| CETRAXATE HCl                                                                    |
| Alprazolam                                                                       |
| LAMOTRIGINE                                                                      |
| CROTAMITON                                                                       |
| AMFEBUTAMONE HCl                                                                 |
| ALFUZOSIN                                                                        |
| Amisulpride                                                                      |
| LOFEPRAMINE                                                                      |
| PEROSPIRONE HCl                                                                  |
| DOCETAXEL                                                                        |
| HONOKIOL                                                                         |
| TOLTERODINE TARTRATE                                                             |
| CARMOFUR                                                                         |
| PAROXETINE                                                                       |
| OLMESARTAN MEDOXOMIL                                                             |
| LOSARTAN Potassium                                                               |
| TEMOZOLOMIDE                                                                     |
| Methyltestosterone                                                               |
| TOSUFLOXACIN TOSYLATE                                                            |
| MECILLINAM                                                                       |
| ATOMOXETINE HCl                                                                  |
| ARTESUNATE                                                                       |
| ITRACONAZOLE                                                                     |
| CEFPODOXIME PROXETIL                                                             |
| BUFLUMEDIL HYDROCHLORIDE                                                         |
| 4-Chloro-N-(2-morpholin-4-yl-ethyl)-benzamide                                    |
| HALOMETASONE MONOHYDRATE                                                         |
| TRICLABENDAZOLE                                                                  |
| ROFECOXIB                                                                        |
| BISOPROLOL FUMARATE                                                              |
| EZETIMIBE                                                                        |
| TIAGABINE HCl                                                                    |
| IDARUBICIN HCl                                                                   |
| FLUBENDAZOLE                                                                     |
| TACROLIMUS                                                                       |
| VALACICLOVIR HYDROCHLORIDE                                                       |
| CLARITHROMYCIN                                                                   |
| ARIPIPRAZOLE                                                                     |
| TRIMEBUTINE MALEATE                                                              |
| Mestanolone                                                                      |
| NISOLDIPINE                                                                      |
| PICEID                                                                           |
| 1-(2-Methyl-5-nitro-imidazol-1-yl)-propan-2-ol                                   |
| NIFEKALANT HCl                                                                   |
| NATEGLINIDE                                                                      |
| MEGESTROL ACETATE                                                                |
| ORMETOPRIM                                                                       |
| ZILEUTON                                                                         |
| STAVUDINE                                                                        |
| GABEXATE MESYLATE                                                                |
| OXICONAZOLE NITRATE                                                              |
| KITASAMYCIN                                                                      |
| FAMCICLOVIR                                                                      |
| (±)-Sotalol hydrochloride                                                        |
| RUFLOXACIN HCl                                                                   |
| TAXIFOLIN-(+)                                                                    |

|                            |
|----------------------------|
| ALOSETRON HCl              |
| BUPROPION HYDROCHLORIDE    |
| IRSOGLADINE MALEATE        |
| ACARBOSE                   |
| BENPROPERINE PHOSPHATE     |
| PHENPROBAMATE              |
| MEMANTINE HYDROCHLORIDE    |
| Carvedilol                 |
| LOMIFYLLINE                |
| PAZUFLOXACIN               |
| MIGLITOL                   |
| TRANILAST                  |
| OLANZAPINE                 |
| Nefazodone                 |
| MOXIFLOXACIN HCl           |
| NELFINAVIR MESYLATE        |
| PRAVASTATIN Sodium         |
| TOPOTECAN HCl              |
| LEVETIRACETAM              |
| PRAMIPEXOLE HCl            |
| RISPERIDONE                |
| PIOGLITAZONE HCl           |
| CILASTATIN Na              |
| ARGATROBAN                 |
| VALDECOXIB                 |
| NAFTOPIDIL                 |
| Nobiletin                  |
| FINASTERIDE                |
| ZOLPIDEM TARTRATE          |
| Viramune                   |
| TOPIRAMATE                 |
| VORICONAZOLE               |
| FENOLDOPAM MESYLATE        |
| ROSIGLITAZONE MALEATE      |
| ESCITALOPRAM OXALATE       |
| ZERANOL                    |
| LATANOPROST                |
| 2',3'-DIDEOXYINOSINE       |
| Sertraline                 |
| CALCIPOTRIOL               |
| EPIRUBICIN HYDROCHLORIDE   |
| BICALUTAMIDE               |
| BENIDIPINE HCl             |
| AMLEXANOX                  |
| CERIVASTATIN Na            |
| ICARIIN                    |
| METHYLANDROSTENEDIOL       |
| TRIPTOLIDE                 |
| ROSIGLITAZONE HCl          |
| FTORAFUR                   |
| OLIGOMYCIN C               |
| BENAZEPRIL HCl             |
| Oxymetholone               |
| IPRIFLAVONE                |
| OXAPROZIN                  |
| ROLIPRAM                   |
| MOSAPRIDE CITRATE          |
| Isoquercitrin              |
| FLUMAZENIL                 |
| OZAGREL HCl                |
| HYPEROSIDE                 |
| RIFABUTIN                  |
| ESMOLOL HYDROCHLORIDE      |
| TADALAFIL                  |
| Modafinil                  |
| DOXORUBICIN HYDROCHLORIDE  |
| MOXONIDINE HCl             |
| Nitrazepam                 |
| PEFLOXACIN MESYLATE        |
| VENLAFAXINE HCl            |
| PANTOPRAZOLE SODIUM SALT   |
| FLUTICASONE PROPIONATE     |
| INDINAVIR SULPHATE         |
| MIDAZOLAM HCl              |
| LAMIVUDINE                 |
| PROCARBAZINE HCl           |
| ESOMEPRAZOLE Mg            |
| SULFASALAZINE              |
| TORASEMIDE                 |
| TROPISETRON HCl            |
| Ranolazine dihydrochloride |
| NITRENDIPINE               |

|                                                                                                                                  |
|----------------------------------------------------------------------------------------------------------------------------------|
| SAQUINAVIR MESYLATE                                                                                                              |
| BIFONAZOLE                                                                                                                       |
| SUMATRIPTAN SUCCINATE                                                                                                            |
| EXEMESTANE                                                                                                                       |
| NITAZOXANIDE                                                                                                                     |
| Diazepam                                                                                                                         |
| QUETIAPINE HEMIFUMARATE                                                                                                          |
| RUTIN                                                                                                                            |
| PENCICLOVIR                                                                                                                      |
| CALCITRIOL                                                                                                                       |
| DIPHENOXYLATE                                                                                                                    |
| Felbamate                                                                                                                        |
| DROPERIDOL                                                                                                                       |
| Pentoxifylline                                                                                                                   |
| TORADOL                                                                                                                          |
| RITONAVIR                                                                                                                        |
| VINORELBINE BITRATE                                                                                                              |
| LINEZOLID                                                                                                                        |
| LOMERIZINE DiHCl                                                                                                                 |
| EFAVIRENZ                                                                                                                        |
| IRBESARTAN                                                                                                                       |
| REPAGLINIDE                                                                                                                      |
| Ethylestrenol                                                                                                                    |
| PTEROSTILBENE                                                                                                                    |
| ROXATIDINE ACETATE HCl                                                                                                           |
| DEXBROMPHENIRAMINE MALEATE                                                                                                       |
| ANAGRELIDE HCl                                                                                                                   |
| TEGASEROD MALEATE                                                                                                                |
| MILRINONE                                                                                                                        |
| LEVOCETIRIZINE                                                                                                                   |
| Citalopram hydrobromide                                                                                                          |
| TICLOPIDINE HCl                                                                                                                  |
| LOXOPROFEN SODIUM                                                                                                                |
| ZAFIRLUKAST                                                                                                                      |
| TERBINAFINE HCl                                                                                                                  |
| ISRADIPINE                                                                                                                       |
| VALSARTAN                                                                                                                        |
| Piroxicam                                                                                                                        |
| GLYCOPYRROLATE                                                                                                                   |
| Physostigmine                                                                                                                    |
| LOBELINE HYDROCHLORIDE                                                                                                           |
| DOXYLAMINE SUCCINATE                                                                                                             |
| Milnacipran                                                                                                                      |
| 5-fluoro-2-pyrimidone                                                                                                            |
| Chlorpheniramine                                                                                                                 |
| DOFETILIDE                                                                                                                       |
| FORMOTEROL FUMARATE DIHYDRATE                                                                                                    |
| RIZATRIPTAN BENZOATE                                                                                                             |
| RIFAPENTINE                                                                                                                      |
| LOTEPREDNOL ETABONATE                                                                                                            |
| ENALAPRILAT                                                                                                                      |
| Donepezil                                                                                                                        |
| Nimetazepam                                                                                                                      |
| NICORANDIL                                                                                                                       |
| TELMISARTAN                                                                                                                      |
| ITOPRIDE HCl                                                                                                                     |
| RIFAXIMIN                                                                                                                        |
| MONTELUKAST Na                                                                                                                   |
| 2',3'-DIDEOXYCYTIDINE                                                                                                            |
| 1H-Imidazol-2-amine, N-(2,6-dichlorophenyl)-4,5-dihydro- [CAS]                                                                   |
| 6H-Pyrido[2,3-b][1,4]benzodiazepin-6-one, 11-[[2-[(diethylamino)methyl]-1-piperidinyl]acetyl]-5,11-dihydro- [CAS]                |
| 1H-Indole-2-propanoic acid, 1-[(4-chlorophenyl)methyl]-3-[(1,1-dimethylethyl)thio]-Alpha,Alpha-dimethyl-5-(1-methylethyl)- [CAS] |
| 1H-Imidazole-5-carboxylic acid, 1-(1-phenylethyl)-, ethyl ester, (R)- [CAS]                                                      |
| Acetamide, 2-amino-N-(1-methyl-1,2-diphenylethyl)-, (+/-)- [CAS]                                                                 |
| Altanserin                                                                                                                       |
| BETAXOLOL HYDROCHLORIDE                                                                                                          |
| IDARUBICIN                                                                                                                       |
| Azasetron                                                                                                                        |
| GR 89696                                                                                                                         |
| DELTA1-HYDROCORTISONE 21-HEMISUCCINATE SODIUM SALT                                                                               |
| DIAZOXIDE                                                                                                                        |
| 2-CHLOROADENOSINE                                                                                                                |
| ORNIDAZOLE                                                                                                                       |
| 1,1-DIMETHYL-4-PHENYLPYPERAZINIUM IODIDE                                                                                         |
| PIRENPERONE                                                                                                                      |
| MESTRANOL                                                                                                                        |
| 2-(2-AMINOETHYL)PYRIDINE                                                                                                         |
| BENACTYZINE HYDROCHLORIDE                                                                                                        |
| DICHLOROACETIC ACID                                                                                                              |
| BESTATIN                                                                                                                         |
| TOREMIFENE CITRATE                                                                                                               |
| GOSERELIN ACETATE                                                                                                                |

|                                                                                                                     |
|---------------------------------------------------------------------------------------------------------------------|
| SECOISOLARICIREBINOL                                                                                                |
| RALTITREXED                                                                                                         |
| DOXAPRAM HYDROCHLORIDE                                                                                              |
| RU 24969                                                                                                            |
| Brucine                                                                                                             |
| TRYPTOLINE                                                                                                          |
| FLUPHENAZINE HYDROCHLORIDE                                                                                          |
| PALONOSETRON HCl                                                                                                    |
| NAPROXEN SODIUM                                                                                                     |
| MEPIVACAINE HYDROCHLORIDE                                                                                           |
| 3-[3,5-DIBROMO-4-HYDROXYBENZOYL]-2-ETHYLBENZOFURAN                                                                  |
| NIMODIPINE                                                                                                          |
| ROLITETRACYCLINE                                                                                                    |
| MEPIRIZOLE                                                                                                          |
| 6-AZAURIDINE                                                                                                        |
| Reichstein A's substance S                                                                                          |
| 3-PYRIDINEMETHANOL                                                                                                  |
| Haloperidol                                                                                                         |
| Stiripentol                                                                                                         |
| Fluperlapine                                                                                                        |
| OXYPHENONIUM BROMIDE                                                                                                |
| Homoveratrylamine                                                                                                   |
| TINIDAZOLE                                                                                                          |
| XANTHINOL NICOTINATE                                                                                                |
| SYNEPHRINE                                                                                                          |
| RESVERATROL                                                                                                         |
| MALTOL                                                                                                              |
| 6-AMINOINDAZOLE                                                                                                     |
| ENROFLOXACIN                                                                                                        |
| DEHYDROCHOLIC ACID                                                                                                  |
| CEFAZOLIN                                                                                                           |
| 1-BENZYLIMIDAZOLE                                                                                                   |
| DULOXETINE HCl                                                                                                      |
| VARDENAFIL CITRATE                                                                                                  |
| ROPIVACAINE HCl                                                                                                     |
| ANASTROZOLE                                                                                                         |
| KETOTIFEN FUMARATE                                                                                                  |
| MEDROXYPROGESTERONE                                                                                                 |
| Pinacidil monohydrate                                                                                               |
| 7-NITROINDAZOLE                                                                                                     |
| 5-Methoxytryptamine                                                                                                 |
| GRANISETRON HCl                                                                                                     |
| Rimcazole                                                                                                           |
| Nafadotride                                                                                                         |
| DESOXIMETASONE                                                                                                      |
| DEXCHLORPHENIRAMINE MALEATE                                                                                         |
| Guanidine, N-cyano-N'-(1,1-dimethylpropyl)-N''-3-pyridinyl- [CAS]                                                   |
| L-694,247                                                                                                           |
| AM-251                                                                                                              |
| HTMT                                                                                                                |
| Benzo[a]phenanthridine-10,11-diol, 5,6,6a,7,8,12b-hexahydro-, trans- [CAS]                                          |
| Methanesulfonamide, N-[4-[[1-[2-(6-methyl-2-pyridinyl)ethyl]-4-piperidinyl]carbonyl]phenyl]-, dihydrochloride [CAS] |
| 2H-Indol-2-one, 1,3-dihydro-1-phenyl-3,3-bis(4-pyridinylmethyl)- [CAS]                                              |
| Beclomethasone                                                                                                      |
| OMEPRAZOLE                                                                                                          |
| DOLASETRON MESYLATE                                                                                                 |
| Zolmitriptan                                                                                                        |
| TREMULACIN                                                                                                          |
| DACTINOMYCIN                                                                                                        |
| Tramadol                                                                                                            |
| CHLORDIAZEPOXIDE                                                                                                    |
| CEFIXIME TRIHYDRATE                                                                                                 |
| CEFDINIR                                                                                                            |
| LOFEXIDINE HCl                                                                                                      |
| BALSALAZIDE                                                                                                         |
| OLOPATADINE HCl                                                                                                     |
| ITAVASTATIN Ca                                                                                                      |
| CORTISONE                                                                                                           |
| CYPROHEPTADINE HYDROCHLORIDE                                                                                        |
| HOMOHARRINGTONINE                                                                                                   |
| CORTICOSTERONE                                                                                                      |
| VECURONIUM BROMIDE                                                                                                  |
| TIBOLONE                                                                                                            |
| NICOTINAMIDE                                                                                                        |
| NIALAMIDE                                                                                                           |
| VINDESINE SULFATE                                                                                                   |
| VINCRISTINE SULFATE                                                                                                 |
| LACIDIPINE                                                                                                          |
| MIRTAZAPINE                                                                                                         |
| AMPIROXICAM                                                                                                         |
| GLIMEPIRIDE                                                                                                         |
| AMLODIPINE BASE                                                                                                     |

|                                                                                                                             |
|-----------------------------------------------------------------------------------------------------------------------------|
| RABEPRAZOLE                                                                                                                 |
| CLOFAZIMINE                                                                                                                 |
| IRINOTECAN HCl (trihydrate)                                                                                                 |
| LANSOPRAZOLE                                                                                                                |
| 8-Chloro-11-piperidin-4-ylidene-6,11-dihydro-5H-benzo[5,6]cyclohepta[1,2-b]pyridine                                         |
| 1,3,5(10)-ESTRADIEN-3-OL-17-ONE SULPHATE, SODIUM SALT                                                                       |
| MIFEPRISTONE                                                                                                                |
| Etoposide                                                                                                                   |
| Sibutramine                                                                                                                 |
| Clobenpropit                                                                                                                |
| HUPERZINE A                                                                                                                 |
| SIBUTRAMINE HCl                                                                                                             |
| Lorazepam                                                                                                                   |
| 8-Azaspiro[4.5]decane-7,9-dione, 8-[2-[[[(2,3-dihydro-1,4-benzodioxin-2-yl)methyl]amino]ethyl]-, monomethanesulfonate [CAS] |
| Adenosine, N-(2-hydroxycyclopentyl)-, (1S-trans)- [CAS]                                                                     |
| AMIODARONE HYDROCHLORIDE                                                                                                    |
| mevastatin                                                                                                                  |
| IMATINIB MESYLATE                                                                                                           |
| Metylperon                                                                                                                  |
| PARÉCOXIB Na                                                                                                                |
| PERGOLIDE MESYLATE SALT                                                                                                     |
| ATRACURIUM BESYLATE                                                                                                         |
| ARTEMETHER                                                                                                                  |
| EBSELEN                                                                                                                     |
| CGS 12066B                                                                                                                  |
| TELITHROMYCIN                                                                                                               |
| CCPA                                                                                                                        |
| PD 81723                                                                                                                    |
| Stanozolol                                                                                                                  |
| Zaleplon                                                                                                                    |
| Prostaglandin E1                                                                                                            |
| Testosterone                                                                                                                |
| DEHYDROEPIANDROSTERONE                                                                                                      |
| SDM25N                                                                                                                      |
| Thiophene, 5-bromo-2-(4-fluorophenyl)-3-[4-(methylsulfonyl)phenyl]- [CAS]                                                   |
| 5-Nonyloxytryptamine                                                                                                        |
| Salmeterol                                                                                                                  |
| SB 205607                                                                                                                   |
| R(+)-SCH-23390 hydrochloride                                                                                                |
